# Supplementary material for: An exceptionally active and selective Pt–Au/TiO2catalyst for hydrogenation of the nitro group in chloronitrobenzene
Source: Royal Society of Chemistry journal article supplement (doi:10.1039/c1gc16001j), 2011-10-28
Supplement: c1gc16001j.pdf [file c1gc16001j.pdf]

## Supplementary information:

**Title: An exceptionally active and selective Pt-Au/TiO<sub>2</sub> catalyst for hydrogenation of the nitro group in chloronitrobenzene**

**Authors: Daiping He, Xiangdong Jiao, Ping Jiang, Jian Wang and Bo-Qing Xu**

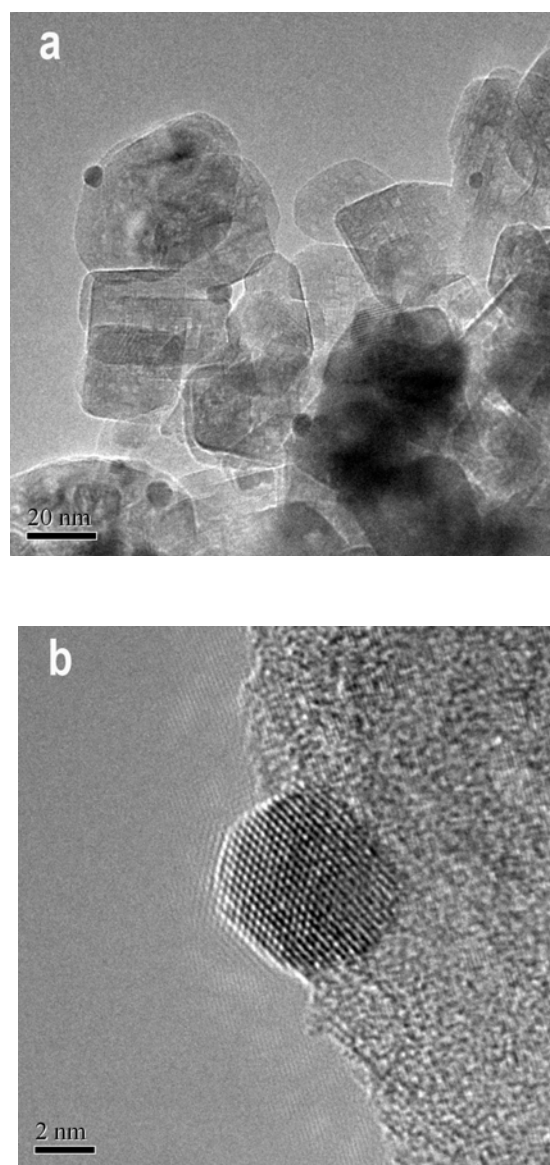

**Figure S1.** HRTEM image of the Pt<sub>0.0002</sub>-Au<sub>0.005</sub>/TiO<sub>2</sub> (a) and a selected metal particle (b).
